# Supplementary material
Source: ML conference proceedings conference paper supplement (https://openreview.net/forum?id=wClmeg9u7G)
Supplement: supplementary_material [file attachment]

# APPENDIX

## CONTENTS

|                                                                                    |           |
|------------------------------------------------------------------------------------|-----------|
| <b>1 Introduction</b>                                                              | <b>1</b>  |
| 1.1 The expressive power of variational inequalities                               | 1         |
| 1.2 Training of supervised models via distributed optimization                     | 2         |
| 1.3 Two classes of compression operators                                           | 2         |
| 1.4 Towards communication-efficient distributed methods for VIs                    | 2         |
| <b>2 Summary of Contributions</b>                                                  | <b>2</b>  |
| 2.1 Two distributed problems: deterministic and stochastic                         | 3         |
| 2.2 Two new methods with compressed communication: <b>MASHA1</b> and <b>MASHA2</b> | 3         |
| 2.3 Theoretical complexity results                                                 | 4         |
| <b>3 Problem Formulation and Assumptions</b>                                       | <b>4</b>  |
| 3.1 Problem formulation                                                            | 4         |
| 3.2 Assumptions                                                                    | 5         |
| <b>4 <b>MASHA1</b>: Handling Unbiased Compressors</b>                              | <b>5</b>  |
| 4.1 The Algorithm                                                                  | 5         |
| 4.2 Theory                                                                         | 6         |
| <b>5 Experiments</b>                                                               | <b>8</b>  |
| 5.1 Bilinear Saddle Point Problem                                                  | 8         |
| 5.2 Adversarial Training of Transformers                                           | 8         |
| <b>A Proof of Theorem 1</b>                                                        | <b>14</b> |
| A.1 A Lemma                                                                        | 14        |
| A.2 Deterministic case: Theorem 1                                                  | 14        |
| A.3 Strongly monotone/convex case                                                  | 15        |
| A.4 Monotone/convex case ( $\mu_h = 0, \mu_F = 0$ )                                | 18        |
| A.5 Stochastic case                                                                | 23        |
| <b>B <b>MASHA2</b>: Handling Contractive Compressors</b>                           | <b>23</b> |
| <b>C Proof of Theorem 2</b>                                                        | <b>23</b> |
| C.1 Strongly monotone case                                                         | 25        |
| <b>D Motivating Examples</b>                                                       | <b>29</b> |

## A PROOF OF THEOREM 1

### A.1 A LEMMA

**Lemma 1** Let  $h$  be  $\mu_h$  - strongly convex and  $z^+ = \text{prox}_{\gamma h}(z)$ . Then for all  $x \in \mathbb{R}^d$  the following inequality holds:

$$\langle z^+ - z, x - z^+ \rangle \geq \gamma \left( h(z^+) - h(x) + \frac{\mu_h}{2} \|z^+ - x\|^2 \right). \quad (14)$$

**Proof:** We use  $\gamma\mu$ -strong convexity of the function  $\gamma h$  (8):

$$\gamma (h(x) - h(z^+)) - \langle \gamma \nabla h(z^+), x - z^+ \rangle \geq \frac{\gamma\mu_h}{2} \|x - z^+\|^2.$$

With definition of prox and necessary optimality condition:  $\gamma \nabla h(z^+) = z - z^+$ , it completes the proof.  $\square$

In the next theorem we will use the following notation:

$$g^k = F(w^k), \quad g^{k+1/2} = Q^{\text{serv}} \left[ \frac{1}{M} \sum_{m=1}^M Q_m^{\text{dev}} (F_m(z^{k+1/2}) - F_m(w^k)) \right] + F(w^k).$$

### A.2 DETERMINISTIC CASE: THEOREM 1

**Proof of Theorem 1:** By Lemma 1 for  $z^{k+1/2} = \text{prox}_{\gamma h}(\bar{z}^k - \gamma g^k)$  and  $z^{k+1} = \text{prox}_{\gamma h}(\bar{z}^k - \gamma g^{k+1/2})$  with  $x = u$  we get

$$\begin{aligned} \langle z^{k+1} - \bar{z}^k + \gamma g^{k+1/2}, u - z^{k+1} \rangle &\geq \gamma \left( h(z^{k+1}) - h(u) + \frac{\mu_h}{2} \|z^{k+1} - u\|^2 \right), \\ \langle z^{k+1/2} - \bar{z}^k + \gamma g^k, z^{k+1} - z^{k+1/2} \rangle &\geq \gamma \left( h(z^{k+1/2}) - h(z^{k+1}) + \frac{\mu_h}{2} \|z^{k+1} - z^{k+1/2}\|^2 \right). \end{aligned}$$

Then we sum two inequalities and make some rearrangement:

$$\begin{aligned} &\langle z^{k+1} - \bar{z}^k, u - z^{k+1} \rangle + \langle z^{k+1/2} - \bar{z}^k, z^{k+1} - z^{k+1/2} \rangle \\ &+ \gamma \langle g^{k+1/2} - g^k, z^{k+1/2} - z^{k+1} \rangle + \gamma \langle g^{k+1/2}, u - z^{k+1/2} \rangle \\ &\geq \gamma \left( h(z^{k+1/2}) - h(u) + \frac{\mu_h}{2} \|z^{k+1} - z^{k+1/2}\|^2 + \frac{\mu_h}{2} \|z^{k+1} - u\|^2 \right). \end{aligned}$$

Multiplying by 2 and using definition of  $\bar{z}^k$ , we have

$$\begin{aligned} &2\tau \langle z^{k+1} - z^k, u - z^{k+1} \rangle + 2(1-\tau) \langle z^{k+1} - w^k, u - z^{k+1} \rangle \\ &+ 2\tau \langle z^{k+1/2} - z^k, z^{k+1} - z^{k+1/2} \rangle + 2(1-\tau) \langle z^{k+1/2} - w^k, z^{k+1} - z^{k+1/2} \rangle \\ &+ 2\gamma \langle g^{k+1/2} - g^k, z^{k+1/2} - z^{k+1} \rangle + 2\gamma \langle g^{k+1/2}, u - z^{k+1/2} \rangle \\ &\geq 2\gamma \left( h(z^{k+1/2}) - h(u) + \frac{\mu_h}{2} \|z^{k+1} - z^{k+1/2}\|^2 + \frac{\mu_h}{2} \|z^{k+1} - u\|^2 \right). \end{aligned}$$

For the first and second lines we use identity  $2\langle a, b \rangle = \|a + b\|^2 - \|a\|^2 - \|b\|^2$ , and get

$$\begin{aligned} &\tau (\|z^k - u\|^2 - \|z^{k+1} - z^k\|^2 - \|z^{k+1} - u\|^2) \\ &+ (1-\tau) (\|w^k - u\|^2 - \|z^{k+1} - w^k\|^2 - \|z^{k+1} - u\|^2) \\ &+ \tau (\|z^{k+1} - z^k\|^2 - \|z^{k+1/2} - z^k\|^2 - \|z^{k+1} - z^{k+1/2}\|^2) \\ &+ (1-\tau) (\|z^{k+1} - w^k\|^2 - \|z^{k+1/2} - w^k\|^2 - \|z^{k+1} - z^{k+1/2}\|^2) \\ &+ 2\gamma \langle g^{k+1/2} - g^k, z^{k+1/2} - z^{k+1} \rangle + 2\gamma \langle g^{k+1/2}, u - z^{k+1/2} \rangle \\ &\geq 2\gamma \left( h(z^{k+1/2}) - h(u) + \frac{\mu_h}{2} \|z^{k+1} - z^{k+1/2}\|^2 + \frac{\mu_h}{2} \|z^{k+1} - u\|^2 \right). \end{aligned}$$

A small rearrangement gives

$$\begin{aligned} (1 + \gamma\mu_h)\|z^{k+1} - u\|^2 &\leq \tau\|z^k - u\|^2 + (1 - \tau)\|w^k - u\|^2 \\ &\quad - \tau\|z^{k+1/2} - z^k\|^2 - (1 - \tau)\|z^{k+1/2} - w^k\|^2 - (1 + \gamma\mu_h)\|z^{k+1} - z^{k+1/2}\|^2 \\ &\quad + 2\gamma\langle g^{k+1/2} - g^k, z^{k+1/2} - z^{k+1} \rangle - 2\gamma\langle g^{k+1/2}, z^{k+1/2} - u \rangle - 2\gamma(h(z^{k+1/2}) - h(u)). \end{aligned}$$

By simple fact:  $2\langle a, b \rangle \leq \eta\|a\|^2 + \frac{1}{\eta}\|b\|^2$  with  $a = g^{k+1/2} - g^k, b = z^{k+1/2} - z^{k+1}, \eta = 2\gamma$ , we get

$$\begin{aligned} (1 + \gamma\mu_h)\|z^{k+1} - u\|^2 &\leq \tau\|z^k - u\|^2 + (1 - \tau)\|w^k - u\|^2 \\ &\quad - \tau\|z^{k+1/2} - z^k\|^2 - (1 - \tau)\|z^{k+1/2} - w^k\|^2 - \left(\frac{1}{2} + \gamma\mu_h\right)\|z^{k+1} - z^{k+1/2}\|^2 \\ &\quad + 2\gamma^2\|g^{k+1/2} - g^k\|^2 - 2\gamma\langle g^{k+1/2}, z^{k+1/2} - u \rangle - 2\gamma(h(z^{k+1/2}) - h(u)). \end{aligned} \quad (15)$$

We now consider the two cases of the theorem separately.

### A.3 STRONGLY MONOTONE/CONVEX CASE

Let substitute  $u = z^*$ , take full mathematical expectation and get

$$\begin{aligned} (1 + \gamma\mu_h)\mathbb{E}[\|z^{k+1} - z^*\|^2] &\leq \tau\mathbb{E}[\|z^k - z^*\|^2] + (1 - \tau)\mathbb{E}[\|w^k - z^*\|^2] \\ &\quad - \tau\mathbb{E}[\|z^{k+1/2} - z^k\|^2] - (1 - \tau)\mathbb{E}[\|z^{k+1/2} - w^k\|^2] - \left(\frac{1}{2} + \gamma\mu_h\right)\mathbb{E}[\|z^{k+1} - z^{k+1/2}\|^2] \\ &\quad + 2\gamma^2\mathbb{E}[\|g^{k+1/2} - g^k\|^2] - 2\gamma\mathbb{E}[\langle g^{k+1/2}, z^{k+1/2} - z^* \rangle + h(z^{k+1/2}) - h(z^*)] \\ &= \tau\mathbb{E}[\|z^k - z^*\|^2] + (1 - \tau)\mathbb{E}[\|w^k - z^*\|^2] \\ &\quad - \tau\mathbb{E}[\|z^{k+1/2} - z^k\|^2] - (1 - \tau)\mathbb{E}[\|z^{k+1/2} - w^k\|^2] - \left(\frac{1}{2} + \gamma\mu_h\right)\mathbb{E}[\|z^{k+1} - z^{k+1/2}\|^2] \\ &\quad + 2\gamma^2\mathbb{E}[\|g^{k+1/2} - g^k\|^2] - 2\gamma\mathbb{E}[\langle \mathbb{E}[g^{k+1/2} | z^{k+1/2}], z^{k+1/2} - z^* \rangle + h(z^{k+1/2}) - h(z^*)]. \end{aligned} \quad (16)$$

Let us work with  $\mathbb{E}[\|g^{k+1/2} - g^k\|^2]$ , with [\(1\)](#) we get

$$\begin{aligned} \mathbb{E}[\|g^{k+1/2} - g^k\|^2] &= \mathbb{E}\left[\left\|Q^{\text{serv}}\left[\frac{1}{M}\sum_{m=1}^M Q_m^{\text{dev}}(F_m(z^{k+1/2}) - F_m(w^k))\right]\right\|^2\right] \\ &\leq \frac{q^{\text{serv}}}{M^2}\mathbb{E}\left[\left\|\sum_{m=1}^M Q_m^{\text{dev}}(F_m(z^{k+1/2}) - F_m(w^k))\right\|^2\right] \\ &= \frac{q^{\text{serv}}}{M^2}\sum_{m=1}^M \mathbb{E}\left[\left\|Q_m^{\text{dev}}(F_m(z^{k+1/2}) - F_m(w^k))\right\|^2\right] \\ &\quad + \frac{q^{\text{serv}}}{M^2}\sum_{m \neq l} \mathbb{E}\left[\langle Q_m^{\text{dev}}(F_m(z^{k+1/2}) - F_m(w^k)); Q_l^{\text{dev}}(F_l(z^{k+1/2}) - F_l(w^k)) \rangle\right] \end{aligned}$$

Next we apply (1) and Assumption 2 for the first term and independence and unbiasedness of  $Q$  for the second term:

$$\begin{aligned}
\mathbb{E} [\|g^{k+1/2} - g^k\|^2] &\leq \frac{q^{\text{serv}}}{M^2} \sum_{m=1}^M q_m^{\text{dev}} L_m^2 \mathbb{E} [\|z^{k+1/2} - w^k\|^2] \\
&\quad + \frac{q^{\text{serv}}}{M^2} \sum_{m \neq l} \mathbb{E} [\langle F_m(z^{k+1/2}) - F_m(w^k); F_l(z^{k+1/2}) - F_l(w^k) \rangle] \\
&\leq \frac{q^{\text{serv}}}{M^2} \sum_{m=1}^M q_m^{\text{dev}} L_m^2 \mathbb{E} [\|z^{k+1/2} - w^k\|^2] \\
&\quad + \frac{q^{\text{serv}}}{2M^2} \sum_{m \neq l} \mathbb{E} [\|F_m(z^{k+1/2}) - F_m(w^k)\|^2 + \|F_l(z^{k+1/2}) - F_l(w^k)\|^2] \\
&\leq \frac{q^{\text{serv}}}{M^2} \sum_{m=1}^M q_m^{\text{dev}} L_m^2 \mathbb{E} [\|z^{k+1/2} - w^k\|^2] \\
&\quad + \frac{q^{\text{serv}}}{2M^2} \sum_{m \neq l} \mathbb{E} [L_m^2 \|z^{k+1/2} - w^k\|^2 + L_l^2 \|z^{k+1/2} - w^k\|^2] \\
&= \frac{q^{\text{serv}}}{M^2} \sum_{m=1}^M q_m^{\text{dev}} L_m^2 \mathbb{E} [\|z^{k+1/2} - w^k\|^2] + \frac{q^{\text{serv}}(M-1)}{M^2} \sum_{m=1}^M L_m^2 \mathbb{E} [\|z^{k+1/2} - w^k\|^2] \\
&= \frac{q^{\text{serv}}}{M^2} \mathbb{E} [\|z^{k+1/2} - w^k\|^2] \cdot \sum_{m=1}^M (q_m^{\text{dev}} + M-1) L_m^2 \tag{17}
\end{aligned}$$

Let us define new constant  $C_q = \sqrt{\frac{q^{\text{serv}}}{M^2} \sum_{m=1}^M (q_m^{\text{dev}} + M-1) L_m^2}$  and then connect (16) and (17):

$$\begin{aligned}
(1 + \gamma\mu_h) \mathbb{E} [\|z^{k+1} - z^*\|^2] &\leq \tau \mathbb{E} [\|z^k - z^*\|^2] + (1 - \tau) \mathbb{E} [\|w^k - z^*\|^2] \\
&\quad - \tau \mathbb{E} [\|z^{k+1/2} - z^k\|^2] - (1 - \tau) \mathbb{E} [\|z^{k+1/2} - w^k\|^2] - \left(\frac{1}{2} + \gamma\mu_h\right) \mathbb{E} [\|z^{k+1} - z^{k+1/2}\|^2] \\
&\quad + 2\gamma^2 C_q^2 \mathbb{E} [\|z^{k+1/2} - w^k\|^2] - 2\gamma \mathbb{E} [\langle F(z^{k+1/2}), z^{k+1/2} - z^* \rangle + h(z^{k+1/2}) - h(z^*)] \\
&= \tau \mathbb{E} [\|z^k - z^*\|^2] + (1 - \tau) \mathbb{E} [\|w^k - z^*\|^2] - \tau \mathbb{E} [\|z^{k+1/2} - z^k\|^2] \\
&\quad - \left(\frac{1}{2} + \gamma\mu_h\right) \mathbb{E} [\|z^{k+1} - z^{k+1/2}\|^2] - ((1 - \tau) - 2\gamma^2 C_q^2) \mathbb{E} [\|z^{k+1/2} - w^k\|^2] \\
&\quad - 2\gamma \mathbb{E} [\langle F(z^{k+1/2}), z^{k+1/2} - z^* \rangle + h(z^{k+1/2}) - h(z^*)].
\end{aligned}$$

The property of the solution (3) gives

$$\begin{aligned}
(1 + \gamma\mu_h) \mathbb{E} [\|z^{k+1} - z^*\|^2] &\leq \tau \mathbb{E} [\|z^k - z^*\|^2] + (1 - \tau) \mathbb{E} [\|w^k - z^*\|^2] - \tau \mathbb{E} [\|z^{k+1/2} - z^k\|^2] \\
&\quad - \left(\frac{1}{2} + \gamma\mu_h\right) \mathbb{E} [\|z^{k+1} - z^{k+1/2}\|^2] - ((1 - \tau) - 2\gamma^2 C_q^2) \mathbb{E} [\|z^{k+1/2} - w^k\|^2] \\
&\quad - 2\gamma \mathbb{E} [\langle F(z^{k+1/2}) - F(z^*), z^{k+1/2} - z^* \rangle].
\end{aligned}$$

And by Assumption 2 in strong monotone case we have

$$\begin{aligned}
(1 + \gamma\mu_h) \mathbb{E} [\|z^{k+1} - z^*\|^2] &\leq \tau \mathbb{E} [\|z^k - z^*\|^2] + (1 - \tau) \mathbb{E} [\|w^k - z^*\|^2] - \tau \mathbb{E} [\|z^{k+1/2} - z^k\|^2] \\
&\quad - \left(\frac{1}{2} + \gamma\mu_h\right) \mathbb{E} [\|z^{k+1} - z^{k+1/2}\|^2] - ((1 - \tau) - 2\gamma^2 C_q^2) \mathbb{E} [\|z^{k+1/2} - w^k\|^2] \\
&\quad - 2\gamma\mu_F \mathbb{E} [\|z^{k+1/2} - z^*\|^2].
\end{aligned}$$

One the other hand we get

$$\mathbb{E} [\|w^{k+1} - z^*\|^2] = (1 - \tau) \mathbb{E} [\|z^{k+1} - z^*\|^2] + \tau \mathbb{E} [\|w^k - z^*\|^2].$$

Summing two previous inequalities:

$$\begin{aligned} \tau \mathbb{E} [\|z^{k+1} - z^*\|^2] + \mathbb{E} [\|w^{k+1} - z^*\|^2] &\leq \tau \mathbb{E} [\|z^k - z^*\|^2] + \mathbb{E} [\|w^k - z^*\|^2] \\ &\quad - \tau \mathbb{E} [\|z^{k+1/2} - z^k\|^2] - \gamma \mu_h \mathbb{E} [\|z^{k+1} - z^*\|^2] - \left(\frac{1}{2} + \gamma \mu_h\right) \mathbb{E} [\|z^{k+1} - z^{k+1/2}\|^2] \\ &\quad - ((1 - \tau) - 2\gamma^2 C_q^2) \mathbb{E} [\|z^{k+1/2} - w^k\|^2] - 2\gamma \mu_F \mathbb{E} [\|z^{k+1/2} - z^*\|^2]. \end{aligned}$$

We have Lyapunov function in the left side:

$$\begin{aligned} \mathbb{E} [V_{k+1}] &= \tau \mathbb{E} [\|z^{k+1} - z^*\|^2] + \mathbb{E} [\|w^{k+1} - z^*\|^2] \\ &\leq \tau \mathbb{E} [\|z^k - z^*\|^2] + \mathbb{E} [\|w^k - z^*\|^2] - \tau \mathbb{E} [\|z^{k+1/2} - z^k\|^2] \\ &\quad - 2\gamma \mu_F \mathbb{E} [\|z^{k+1/2} - z^*\|^2] - \gamma \mu_h \mathbb{E} [\|z^{k+1} - z^*\|^2] - \left(\frac{1}{2} + \gamma \mu_h\right) \mathbb{E} [\|z^{k+1} - z^{k+1/2}\|^2] \\ &\quad - ((1 - \tau) - 2\gamma^2 C_q^2) \mathbb{E} [\|z^{k+1/2} - w^k\|^2]. \end{aligned}$$

With  $-\|z^{k+1} - z^*\|^2 \leq -\frac{1}{2}\|z^{k+1/2} - z^*\|^2 + \|z^{k+1} - z^{k+1/2}\|^2$  we deduce:

$$\begin{aligned} \mathbb{E} [V_{k+1}] &\leq \tau \mathbb{E} [\|z^k - z^*\|^2] + \mathbb{E} [\|w^k - z^*\|^2] - \tau \mathbb{E} [\|z^{k+1/2} - z^k\|^2] \\ &\quad - ((1 - \tau) - 2\gamma^2 C_q^2) \mathbb{E} [\|z^{k+1/2} - w^k\|^2] - \left(\frac{1}{2} + \gamma \mu_h\right) \mathbb{E} [\|z^{k+1} - z^{k+1/2}\|^2] \\ &\quad - \gamma \left(2\mu_F + \frac{\mu_h}{2}\right) \tau \mathbb{E} [\|z^{k+1/2} - z^*\|^2] - \gamma \left(2\mu_F + \frac{\mu_h}{2}\right) \cdot (1 - \tau) \mathbb{E} [\|z^{k+1/2} - z^*\|^2]. \end{aligned}$$

A simple facts:  $\|z^{k+1/2} - z^*\|^2 \geq \frac{1}{2}\|z^k - z^*\|^2 - \|z^{k+1/2} - z^k\|^2$  and  $\|z^{k+1/2} - z^*\|^2 \geq \frac{1}{2}\|w^k - z^*\|^2 - \|z^{k+1/2} - w^k\|^2$ , gives

$$\begin{aligned} \mathbb{E} [V_{k+1}] &\leq \tau \mathbb{E} [\|z^k - z^*\|^2] + \mathbb{E} [\|w^k - z^*\|^2] \\ &\quad - \left((1 - \tau) - 2\gamma^2 C_q^2 - \gamma \left(2\mu_F + \frac{\mu_h}{2}\right) \cdot (1 - \tau)\right) \mathbb{E} [\|z^{k+1/2} - w^k\|^2] \\ &\quad - \left(\frac{1}{2} + \gamma \mu_h\right) \mathbb{E} [\|z^{k+1} - z^{k+1/2}\|^2] - \left(1 - \gamma \left(2\mu_F + \frac{\mu_h}{2}\right)\right) \tau \mathbb{E} [\|z^{k+1/2} - z^k\|^2] \\ &\quad - \gamma \left(\mu_F + \frac{\mu_h}{4}\right) \tau \mathbb{E} [\|z^k - z^*\|^2] - \gamma \left(\mu_F + \frac{\mu_h}{4}\right) \cdot (1 - \tau) \mathbb{E} [\|w^k - z^*\|^2]. \quad (18) \end{aligned}$$

Next we work with the last line of (18):

$$\begin{aligned} &-\gamma \left(\mu_F + \frac{\mu_h}{4}\right) \tau \mathbb{E} [\|z^k - z^*\|^2] - \gamma \left(\mu_F + \frac{\mu_h}{4}\right) \cdot (1 - \tau) \mathbb{E} [\|w^k - z^*\|^2] \\ &= -\frac{\gamma}{2} \left(\mu_F + \frac{\mu_h}{4}\right) \tau \mathbb{E} [\|z^k - z^*\|^2] - \frac{\gamma}{2} \left(\mu_F + \frac{\mu_h}{4}\right) \tau \mathbb{E} [\|z^k - z^*\|^2] \\ &\quad - \gamma \left(\mu_F + \frac{\mu_h}{4}\right) \cdot (1 - \tau) \mathbb{E} [\|w^k - z^*\|^2] \\ &\leq -\frac{\gamma}{2} \left(\mu_F + \frac{\mu_h}{4}\right) \tau \mathbb{E} [\|z^k - z^*\|^2] - \frac{\gamma}{4} \left(\mu_F + \frac{\mu_h}{4}\right) \tau \mathbb{E} [\|w^k - z^*\|^2] \\ &\quad + \frac{\gamma}{2} \left(\mu_F + \frac{\mu_h}{4}\right) \tau \mathbb{E} [\|z^k - w^k\|^2] - \gamma \left(\mu_F + \frac{\mu_h}{4}\right) \cdot (1 - \tau) \mathbb{E} [\|w^k - z^*\|^2] \\ &\leq -\frac{\gamma}{4} \left(\mu_F + \frac{\mu_h}{4}\right) \tau \mathbb{E} [\|z^k - z^*\|^2] - \frac{\gamma}{4} \left(\mu_F + \frac{\mu_h}{4}\right) \mathbb{E} [\|w^k - z^*\|^2] \\ &\quad + \frac{\gamma}{2} \left(\mu_F + \frac{\mu_h}{4}\right) \tau \mathbb{E} [\|z^k - w^k\|^2] \\ &\leq -\frac{\gamma}{4} \left(\mu_F + \frac{\mu_h}{4}\right) \tau \mathbb{E} [\|z^k - z^*\|^2] - \frac{\gamma}{4} \left(\mu_F + \frac{\mu_h}{4}\right) \mathbb{E} [\|w^k - z^*\|^2] \\ &\quad + \gamma \left(\mu_F + \frac{\mu_h}{4}\right) \tau \mathbb{E} [\|z^{k+1/2} - z^k\|^2] + \gamma \left(\mu_F + \frac{\mu_h}{4}\right) \tau \mathbb{E} [\|z^{k+1/2} - w^k\|^2]. \end{aligned}$$

Substituting this into (18), we get

$$\begin{aligned}
\mathbb{E}[V_{k+1}] &\leq \tau \mathbb{E}[\|z^k - z^*\|^2] + \mathbb{E}[\|w^k - z^*\|^2] \\
&\quad - \left( (1 - \tau) - 2\gamma^2 C_q^2 - \gamma \left( 2\mu_F + \frac{\mu_h}{2} \right) \right) \mathbb{E}[\|z^{k+1/2} - w^k\|^2] \\
&\quad - \left( \frac{1}{2} + \gamma\mu_h \right) \mathbb{E}[\|z^{k+1} - z^{k+1/2}\|^2] - \left( 1 - 3\gamma \left( \mu_F + \frac{\mu_h}{4} \right) \right) \tau \mathbb{E}[\|z^{k+1/2} - z^k\|^2] \\
&\quad - \frac{\gamma}{4} \left( \mu_F + \frac{\mu_h}{4} \right) \tau \mathbb{E}[\|z^k - z^*\|^2] - \frac{\gamma}{4} \left( \mu_F + \frac{\mu_h}{4} \right) \mathbb{E}[\|w^k - z^*\|^2]. \tag{19}
\end{aligned}$$

It remains only to choose  $\gamma \leq \min \left\{ \frac{\sqrt{1-\tau}}{4C_q}; \frac{1-\tau}{4(\mu_F + \mu_h)} \right\}$  and get

$$\mathbb{E}[V_{k+1}] \leq \left( 1 - \gamma \cdot \frac{\mu_F + \mu_h}{16} \right) \cdot \mathbb{E}[V_k].$$

Running the recursion completes the proof.

#### A.4 MONOTONE/CONVEX CASE ( $\mu_h = 0, \mu_F = 0$ )

We start from (15) with additional notation  $\text{gap}(z^{k+1/2}, u) = \langle F(z^{k+1/2}), z^{k+1/2} - u \rangle + h(z^{k+1/2}) - h(u)$ :

$$\begin{aligned}
2\gamma \cdot \text{gap}(z^{k+1/2}, u) + \|z^{k+1} - u\|^2 &\leq \tau \|z^k - u\|^2 + (1 - \tau) \|w^k - u\|^2 \\
&\quad - \tau \|z^{k+1/2} - z^k\|^2 - (1 - \tau) \|z^{k+1/2} - w^k\|^2 + 2\gamma^2 \|g^{k+1/2} - g^k\|^2 \\
&\quad - 2\gamma \langle g^{k+1/2} - F(z^{k+1/2}), z^{k+1/2} - u \rangle.
\end{aligned}$$

Adding both sides  $\|w^{k+1} - u\|^2$  and making small rearrangement we have

$$\begin{aligned}
2\gamma \cdot \text{gap}(z^{k+1/2}, u) &\leq [\tau \|z^k - u\|^2 + \|w^k - u\|^2] - [\tau \|z^{k+1} - u\|^2 + \|w^{k+1} - u\|^2] \\
&\quad - \tau \|w^k - u\|^2 - (1 - \tau) \|z^{k+1} - u\|^2 + \|w^{k+1} - u\|^2 \\
&\quad - \tau \|z^{k+1/2} - z^k\|^2 - (1 - \tau) \|z^{k+1/2} - w^k\|^2 + 2\gamma^2 \|g^{k+1/2} - g^k\|^2 \\
&\quad - 2\gamma \langle g^{k+1/2} - F(z^{k+1/2}), z^{k+1/2} - u \rangle.
\end{aligned}$$

Then we sum up over  $k = 0, \dots, K-1$ , take maximum of both sides over  $z \in \mathcal{C}$ , after take expectation and get

$$\begin{aligned}
2\gamma \cdot \mathbb{E} \left[ \max_{u \in \mathcal{C}} \sum_{k=0}^{K-1} \text{gap}(z^{k+1/2}, u) \right] &\leq \max_{u \in \mathcal{C}} [\tau \|z^0 - u\|^2 + \|w^0 - u\|^2] \\
&\quad + \mathbb{E} \left[ \max_{u \in \mathcal{C}} \sum_{k=0}^{K-1} [-\tau \|w^k - u\|^2 - (1 - \tau) \|z^{k+1} - u\|^2 + \|w^{k+1} - u\|^2] \right] \\
&\quad - \sum_{k=0}^{K-1} \left[ \tau \mathbb{E}[\|z^{k+1/2} - z^k\|^2] + (1 - \tau) \mathbb{E}[\|z^{k+1/2} - w^k\|^2] - 2\gamma^2 \mathbb{E}[\|g^{k+1/2} - g^k\|^2] \right] \\
&\quad + 2\gamma \mathbb{E} \left[ \max_{u \in \mathcal{C}} \sum_{k=0}^{K-1} [\langle g^{k+1/2} - F(z^{k+1/2}), u - z^{k+1/2} \rangle] \right].
\end{aligned}$$

Applying (17) for  $\mathbb{E} [\|g^{k+1/2} - g^k\|^2]$ , we get

$$\begin{aligned}
2\gamma \cdot \mathbb{E} \left[ \max_{u \in \mathcal{C}} \sum_{k=0}^{K-1} \text{gap}(z^{k+1/2}, u) \right] &\leq \max_{u \in \mathcal{C}} [\tau \|z^0 - u\|^2 + \|w^0 - u\|^2] \\
&+ \mathbb{E} \left[ \max_{u \in \mathcal{C}} \sum_{k=0}^{K-1} [-\tau \|w^k - u\|^2 - (1-\tau) \|z^{k+1} - u\|^2 + \|w^{k+1} - u\|^2] \right] \\
&- \sum_{k=0}^{K-1} \left[ \tau \mathbb{E} [\|z^{k+1/2} - z^k\|^2] + (1-\tau) \mathbb{E} [\|z^{k+1/2} - w^k\|^2] \right] \\
&- 2\gamma^2 C_q^2 \mathbb{E} [\|z^{k+1/2} - w^k\|^2] \\
&+ 2\gamma \mathbb{E} \left[ \max_{u \in \mathcal{C}} \sum_{k=0}^{K-1} [\langle g^{k+1/2} - F(z^{k+1/2}), u - z^{k+1/2} \rangle] \right].
\end{aligned}$$

With  $\gamma \leq \frac{\sqrt{1-\tau}}{2C_q}$  we get

$$\begin{aligned}
2\gamma \cdot \mathbb{E} \left[ \max_{u \in \mathcal{C}} \sum_{k=0}^{K-1} \text{gap}(z^{k+1/2}, u) \right] &\leq \max_{u \in \mathcal{C}} [\tau \|z^0 - u\|^2 + \|w^0 - u\|^2] \\
&+ \mathbb{E} \left[ \max_{u \in \mathcal{C}} \sum_{k=0}^{K-1} [-\tau \|w^k - u\|^2 - (1-\tau) \|z^{k+1} - u\|^2 + \|w^{k+1} - u\|^2] \right] \\
&+ 2\gamma \mathbb{E} \left[ \max_{u \in \mathcal{C}} \sum_{k=0}^{K-1} [\langle g^{k+1/2} - F(z^{k+1/2}), u - z^{k+1/2} \rangle] \right]. \tag{20}
\end{aligned}$$

To finish the proof we need to estimate terms in two last lines. We begin with  $\mathbb{E} \left[ \max_{u \in \mathcal{C}} \sum_{k=0}^{K-1} \langle F(z^{k+1/2}) - g^{k+1/2}, z^{k+1/2} - u \rangle \right]$ . Let define sequence  $v$ :  $v^0 = z^0$ ,  $v^{k+1} = \text{prox}_{\gamma h}(v^k - \gamma \delta^k)$  with  $\delta^k = F(z^{k+1/2}) - g^{k+1/2}$ . Then we have

$$\sum_{k=0}^{K-1} \langle \delta^k, z^{k+1/2} - u \rangle = \sum_{k=0}^{K-1} \langle \delta^k, z^{k+1/2} - v^k \rangle + \sum_{k=0}^{K-1} \langle \delta^k, v^k - u \rangle. \tag{21}$$

By the definition of  $v^{k+1}$  (property of prox), we have for all  $z \in \mathcal{Z}$

$$\langle v^{k+1} - v^k + \gamma \delta^k, z - v^{k+1} \rangle \geq 0.$$

Rewriting this inequality, we get

$$\begin{aligned}
\langle \gamma \delta^k, v^k - z \rangle &\leq \langle \gamma \delta^k, v^k - v^{k+1} \rangle + \langle v^{k+1} - v^k, z - v^{k+1} \rangle \\
&\leq \langle \gamma \delta^k, v^k - v^{k+1} \rangle + \frac{1}{2} \|v^k - z\|^2 - \frac{1}{2} \|v^{k+1} - z\|^2 - \frac{1}{2} \|v^k - v^{k+1}\|^2 \\
&\leq \frac{\gamma^2}{2} \|\delta^k\|^2 + \frac{1}{2} \|v^k - v^{k+1}\|^2 + \frac{1}{2} \|v^k - z\|^2 - \frac{1}{2} \|v^{k+1} - z\|^2 - \frac{1}{2} \|v^k - v^{k+1}\|^2 \\
&= \frac{\gamma^2}{2} \|\delta^k\|^2 + \frac{1}{2} \|v^k - z\|^2 - \frac{1}{2} \|v^{k+1} - z\|^2.
\end{aligned}$$

With (21) it gives

$$\begin{aligned}
\sum_{k=0}^{K-1} \langle \delta^k, z^{k+1/2} - u \rangle &\leq \sum_{k=0}^{K-1} \langle \delta^k, z^{k+1/2} - v^k \rangle + \frac{1}{\gamma} \sum_{k=0}^{K-1} \left( \frac{\gamma^2}{2} \|\delta^k\|^2 + \frac{1}{2} \|v^k - u\|^2 - \frac{1}{2} \|v^{k+1} - u\|^2 \right) \\
&\leq \sum_{k=0}^{K-1} \langle \delta^k, z^{k+1/2} - v^k \rangle + \frac{\gamma}{2} \sum_{k=0}^{K-1} \|\delta^k\|^2 + \frac{1}{2\gamma} \|v^0 - u\|^2.
\end{aligned}$$

We take the maximum on  $u$  and get

$$\max_{u \in \mathcal{C}} \sum_{k=0}^{K-1} \langle \delta^k, z^{k+1/2} - u \rangle \leq \sum_{k=0}^{K-1} \langle \delta^k, z^{k+1/2} - v^k \rangle + \frac{\gamma}{2} \sum_{k=0}^{K-1} \|F(z^{k+1/2}) - g^{k+1/2}\|^2 + \frac{1}{2\gamma} \max_{u \in \mathcal{C}} \|v^0 - u\|^2.$$

Taking the full expectation, we get

$$\begin{aligned} \mathbb{E} \left[ \max_{u \in \mathcal{C}} \sum_{k=0}^{K-1} \langle \delta^k, z^{k+1/2} - u \rangle \right] &\leq \mathbb{E} \left[ \sum_{k=0}^{K-1} \langle \delta^k, z^{k+1/2} - v^k \rangle \right] \\ &\quad + \frac{\gamma}{2} \sum_{k=0}^{K-1} \mathbb{E} \left[ \|F(z^{k+1/2}) - g^{k+1/2}\|^2 \right] + \frac{1}{2\gamma} \max_{u \in \mathcal{C}} \|v^0 - u\|^2 \\ &= \mathbb{E} \left[ \sum_{k=0}^{K-1} \langle \mathbb{E} [F(z^{k+1/2}) - g^{k+1/2} \mid z^{k+1/2} - v^k], z^{k+1/2} - v^k \rangle \right] \\ &\quad + \frac{\gamma}{2} \sum_{k=0}^{K-1} \mathbb{E} \left[ \|F(z^{k+1/2}) - g^{k+1/2}\|^2 \right] + \frac{1}{2\gamma} \max_{u \in \mathcal{C}} \|v^0 - u\|^2 \\ &= \frac{\gamma}{2} \sum_{k=0}^{K-1} \mathbb{E} \left[ \|F(z^{k+1/2}) - g^{k+1/2}\|^2 \right] + \frac{1}{2\gamma} \max_{u \in \mathcal{C}} \|v^0 - u\|^2. \end{aligned} \quad (22)$$

Now let us estimate  $\mathbb{E} \left[ \max_{u \in \mathcal{C}} \sum_{k=0}^{K-1} [-\tau \|w^k - u\|^2 - (1-\tau) \|z^{k+1} + u\|^2 + \|w^{k+1} - u\|^2] \right]$ , for this we note that

$$\begin{aligned} &\mathbb{E} \left[ \max_{u \in \mathcal{C}} \sum_{k=0}^{K-1} [-\tau \|w^k - u\|^2 - (1-\tau) \|z^{k+1} - u\|^2 + \|w^{k+1} - u\|^2] \right] \\ &= \mathbb{E} \left[ \max_{u \in \mathcal{C}} \sum_{k=0}^{K-1} [-2 \langle (1-\tau)z^{k+1} + \tau w^k - w^{k+1}, u \rangle - (1-\tau) \|z^{k+1}\|^2 - \tau \|w^k\|^2 + \|w^{k+1}\|^2] \right] \\ &= \mathbb{E} \left[ \max_{u \in \mathcal{C}} \sum_{k=0}^{K-1} [-2 \langle (1-\tau)z^{k+1} + \tau w^k - w^{k+1}, u \rangle] \right] \\ &\quad + \mathbb{E} \left[ \sum_{k=0}^{K-1} -(1-\tau) \|z^{k+1}\|^2 - \tau \|w^k\|^2 + \|w^{k+1}\|^2 \right]. \end{aligned}$$

One can note that by definition  $w^{k+1}$ :  $\mathbb{E} [(1-\tau) \|z^{k+1}\|^2 + \tau \|w^k\|^2 - \|w^{k+1}\|^2] = 0$ , then

$$\begin{aligned} &\mathbb{E} \left[ \max_{u \in \mathcal{C}} \sum_{k=0}^{K-1} [-\tau \|w^k - u\|^2 - (1-\tau) \|z^{k+1} - u\|^2 + \|w^{k+1} - u\|^2] \right] \\ &= 2\mathbb{E} \left[ \max_{u \in \mathcal{C}} \sum_{k=0}^{K-1} \langle (1-\tau)z^{k+1} + \tau w^k - w^{k+1}, -u \rangle \right] \\ &= 2\mathbb{E} \left[ \max_{u \in \mathcal{C}} \sum_{k=0}^{K-1} \langle (1-\tau)z^{k+1} + \tau w^k - w^{k+1}, u \rangle \right]. \end{aligned}$$



Further, one can carry out the reasoning similarly to chain for (22):

$$\begin{aligned}
& \mathbb{E} \left[ \max_{u \in \mathcal{C}} \sum_{k=0}^{K-1} [\tau \|w^k - u\|^2 + (1-\tau) \|z^{k+1} - u\|^2 - \|w^{k+1} - u\|^2] \right] \\
& \leq \sum_{k=0}^{K-1} \mathbb{E} [\|(1-\tau)z^{k+1} + \tau w^k - w^{k+1}\|^2] + \max_{u \in \mathcal{C}} \|v^0 - u\|^2 \\
& = \sum_{k=0}^{K-1} \mathbb{E} [\|\mathbb{E}_{w^{k+1}}[w^{k+1}] - w^{k+1}\|^2] + \max_{u \in \mathcal{C}} \|v^0 - u\|^2 \\
& = \sum_{k=0}^{K-1} \mathbb{E} [-\|\mathbb{E}_{w^{k+1}}[w^{k+1}]\|^2 + \mathbb{E}_{w^{k+1}} \|w^{k+1}\|^2] + \max_{u \in \mathcal{C}} \|v^0 - u\|^2 \\
& = \sum_{k=0}^{K-1} \mathbb{E} [-\|(1-\tau)z^{k+1} + \tau w^k\|^2 + (1-\tau) \|z^{k+1}\|^2 + \tau \|w^k\|^2] + \max_{u \in \mathcal{C}} \|v^0 - u\|^2 \\
& = \sum_{k=0}^{K-1} \tau(1-\tau) \mathbb{E} [\|z^{k+1} - w^k\|^2] + \max_{u \in \mathcal{C}} \|v^0 - u\|^2. \tag{23}
\end{aligned}$$

Substituting (22) and (23) in (20) we get

$$\begin{aligned}
2\gamma \cdot \mathbb{E} \left[ \max_{u \in \mathcal{C}} \sum_{k=0}^{K-1} \text{gap}(z^{k+1/2}, u) \right] & \leq \max_{u \in \mathcal{C}} [(2+\tau) \|z^0 - u\|^2 + \|w^0 - u\|^2] \\
& + \sum_{k=0}^{K-1} \left[ \tau(1-\tau) \mathbb{E} [\|z^{k+1} - w^k\|^2] + \gamma^2 \mathbb{E} [\|F(z^{k+1/2}) - g^{k+1/2}\|^2] \right]. \tag{24}
\end{aligned}$$

Next we work separately with  $\mathbb{E} [\|F(z^{k+1/2}) - g^{k+1/2}\|^2]$ :

$$\begin{aligned}
& \mathbb{E} [\|F(z^{k+1/2}) - g^{k+1/2}\|^2] \\
& = \mathbb{E} \left[ \left\| Q^{\text{serv}} \left[ \frac{1}{M} \sum_{m=1}^M Q_m^{\text{dev}}(F_m(z^{k+1/2}) - F_m(w^k)) \right] + F(w^k) - F(z^{k+1/2}) \right\|^2 \right] \\
& = \mathbb{E} \left[ \left\| Q^{\text{serv}} \left[ \frac{1}{M} \sum_{m=1}^M Q_m^{\text{dev}}(F_m(z^{k+1/2}) - F_m(w^k)) \right] \right\|^2 \right] + \mathbb{E} [\|F(z^{k+1/2}) - F(w^k)\|^2] \\
& + \mathbb{E} \left[ \left\langle Q^{\text{serv}} \left[ \frac{1}{M} \sum_{m=1}^M Q_m^{\text{dev}}(F_m(z^{k+1/2}) - F_m(w^k)) \right]; F(z^{k+1/2}) - F(w^k) \right\rangle \right].
\end{aligned}$$

With (17) we get

$$\begin{aligned}
\mathbb{E} [\|F(z^{k+1/2}) - g^{k+1/2}\|^2] & \leq C_q^2 \mathbb{E} [\|z^{k+1/2} - w^k\|^2] + \mathbb{E} [\|F(z^{k+1/2}) - F(w^k)\|^2] \\
& + \mathbb{E} \left[ \left\langle \frac{1}{M} \sum_{m=1}^M Q_m^{\text{dev}}(F_m(z^{k+1/2}) - F_m(w^k)); F(z^{k+1/2}) - F(w^k) \right\rangle \right] \\
& = C_q^2 \mathbb{E} [\|z^{k+1/2} - w^k\|^2] + 2\mathbb{E} [\|F(z^{k+1/2}) - F(w^k)\|^2] \\
& \leq C_q^2 \mathbb{E} [\|z^{k+1/2} - w^k\|^2] + \frac{2}{M} \sum_{m=1}^M L_m^2 \cdot \mathbb{E} [\|z^{k+1/2} - w^k\|^2]. \tag{25}
\end{aligned}$$

With new notation  $L^2 = \frac{1}{M} \sum_{m=1}^M L_m^2$  from (24) and (25) we have

$$\begin{aligned} 2\gamma \cdot \mathbb{E} \left[ \max_{u \in \mathcal{C}} \sum_{k=0}^{K-1} \text{gap}(z^{k+1/2}, u) \right] &\leq \max_{u \in \mathcal{C}} [(2 + \tau) \|z^0 - u\|^2 + \|w^0 - u\|^2] \\ &\quad + \sum_{k=0}^{K-1} \left[ \tau(1 - \tau) \mathbb{E} [\|z^{k+1} - w^k\|^2] + \gamma^2 (C_q^2 + 2L^2) \mathbb{E} [\|z^{k+1/2} - w^k\|^2] \right]. \end{aligned}$$

With  $\gamma \leq \frac{\sqrt{1-\tau}}{2\sqrt{C_q^2 + 2L^2}}$  we deduce to

$$\begin{aligned} 2\gamma \cdot \mathbb{E} \left[ \max_{u \in \mathcal{C}} \sum_{k=0}^{K-1} \text{gap}(z^{k+1/2}, u) \right] &\leq \max_{u \in \mathcal{C}} [(2 + \tau) \|z^0 - u\|^2 + \|w^0 - u\|^2] \\ &\quad + (1 - \tau) \sum_{k=0}^{K-1} \left[ \mathbb{E} [\|z^{k+1} - w^k\|^2] + \mathbb{E} [\|z^{k+1/2} - w^k\|^2] \right] \\ &\leq \max_{u \in \mathcal{C}} [(2 + \tau) \|z^0 - u\|^2 + \|w^0 - u\|^2] \\ &\quad + 3(1 - \tau) \sum_{k=0}^{K-1} \left[ \mathbb{E} [\|z^{k+1} - z^{k+1/2}\|^2] + \mathbb{E} [\|z^{k+1/2} - w^k\|^2] \right]. \end{aligned}$$

Let us go back to (19) with  $\mu_h = 0$ ,  $\mu_F = 0$ ,  $\gamma \leq \frac{\sqrt{1-\tau}}{4C_q}$  and get that

$$\begin{aligned} \mathbb{E} [V_{k+1}] &\leq \mathbb{E} [V_k] - ((1 - \tau) - 2\gamma^2 C_q^2) \mathbb{E} [\|z^{k+1/2} - w^k\|^2] \\ &\quad - \frac{1}{2} \mathbb{E} [\|z^{k+1} - z^{k+1/2}\|^2] \\ &\leq \mathbb{E} [V_k] - \frac{(1 - \tau)}{2} \mathbb{E} [\|z^{k+1/2} - w^k\|^2] \\ &\quad - \frac{(1 - \tau)}{2} \mathbb{E} [\|z^{k+1} - z^{k+1/2}\|^2]. \end{aligned}$$

Hence substituting this we go to the end of the proof:

$$\begin{aligned} 2\gamma \cdot \mathbb{E} \left[ \max_{u \in \mathcal{C}} \sum_{k=0}^{K-1} \text{gap}(z^{k+1/2}, u) \right] &\leq \max_{u \in \mathcal{C}} [(2 + \tau) \|z^0 - u\|^2 + \|w^0 - u\|^2] + 6 \sum_{k=0}^{K-1} [\mathbb{E} [V_k] - \mathbb{E} [V_{k+1}]] \\ &\leq \max_{u \in \mathcal{C}} [(2 + 7\tau) \|z^0 - u\|^2 + 7\|w^0 - u\|^2] \\ &\leq \max_{u \in \mathcal{C}} [16\|z^0 - u\|^2]. \end{aligned}$$

It remains to slightly correct the convergence criterion by monotonicity of  $F$  and Jensen's inequality for convex functions:

$$\begin{aligned} \mathbb{E} \left[ \max_{u \in \mathcal{C}} \sum_{k=0}^{K-1} \text{gap}(z^{k+1/2}, u) \right] &= \mathbb{E} \left[ \max_{u \in \mathcal{C}} \sum_{k=0}^{K-1} [\langle F(z^{k+1/2}), z^{k+1/2} - u \rangle + h(z^{k+1/2}) - h(u)] \right] \\ &\geq \mathbb{E} \left[ \max_{u \in \mathcal{C}} \sum_{k=0}^{K-1} [\langle F(u), z^{k+1/2} - u \rangle + h(z^{k+1/2}) - h(u)] \right] \\ &\geq \mathbb{E} \left[ K \cdot \max_{u \in \mathcal{C}} [\langle F(u), \bar{z}^K - u \rangle + h(\bar{z}^K) - h(u)] \right] \\ &= K \cdot \mathbb{E} [\text{Gap}(\bar{z}^K)], \end{aligned}$$

where we additionally use  $\bar{z}^K = \frac{1}{K} \sum_{k=0}^{K-1} z^{k+1/2}$ . This brings us to

$$\mathbb{E} [\text{Gap}(\bar{z}^K)] \leq \frac{8 \max_{u \in \mathcal{C}} [\|z^0 - u\|^2]}{\gamma K}.$$

Theorem 1 is completely proved for deterministic case.  $\square$

#### A.5 STOCHASTIC CASE

The case of a finite sum (stochastic) is proved in a similar way. We need to replace  $F_m$  with  $F_{m, \pi_m^k}$ .

## B MASHA2: HANDLING CONTRACTIVE COMPRESSORS

Now we present a method for working with biased compression operators – **MASHA2**. Algorithm 1 and Algorithm 2 are similar. The main and key difference is the error feedback technique [Karimireddy et al. \(2019\)](#), which is classic for working with biased compressors. To do this, we need to introduce additional sequences the sequence  $e_m$ . The purpose of these sequences is to accumulate error - something that is not communicated in previous iterations. Additionally, for Algorithm 2, we consider a simpler setting than for Algorithm 1, namely  $\mathcal{Z} = \mathbb{R}^d$  and  $h = 0$ . In this case  $\text{prox}_{\gamma h}(z) = z$ . Also, in the case of comps, we compress the information in one direction - the server makes a full broadcast.

Similarly to Theorem 1 we use Lyapunov function

$$\hat{V}_k = \tau \|\hat{z}^k - z^*\|^2 + \|\hat{w}^k - z^*\|^2,$$

where  $\hat{z}^k = z^k - \frac{1}{M} \sum_{m=1}^M e_m^k$ ,  $\hat{w}^k = w^k - \frac{1}{M} \sum_{m=1}^M e_m^k$ .

**Theorem 2** Let Assumptions [1](#) and [2](#) (SM) be satisfied. Then, if  $\gamma \leq \min \left( \frac{1-\tau}{4\mu_F}, \frac{\sqrt{1-\tau}}{60\delta L}, \frac{\mu_F(1-\tau)}{10^5 \tau^2 \delta^2 L^2} \right)$ , the following estimates holds

$$\mathbb{E} [\hat{V}_K] \leq (1 - \gamma \cdot \frac{\mu_F}{4})^{K-1} \cdot \hat{V}_0.$$

The proof of the above theorem can be found in Appendix [C](#).

## C PROOF OF THEOREM 2

We first introduce useful notation:

$$\hat{z}^k = z^k - \frac{1}{M} \sum_{m=1}^M e_m^k, \quad \hat{z}^{k+1/2} = z^{k+1/2} - \frac{1}{M} \sum_{m=1}^M e_m^k, \quad \hat{w}^k = w^k - \frac{1}{M} \sum_{m=1}^M e_m^k.$$

It is easy to verify that

$$\begin{aligned} \hat{z}^{k+1} &= z^{k+1} - \frac{1}{M} \sum_{m=1}^M e_m^{k+1} \\ &= z^{k+1/2} - \frac{1}{M} \sum_{m=1}^M C_m^{\text{dev}}(\gamma \cdot F_m(z^{k+1/2}) - \gamma \cdot F_m(w^k) + e_m^k) \\ &\quad - \frac{1}{M} \sum_{m=1}^M [e_m^k + \gamma \cdot F_m(z^{k+1/2}) - \gamma \cdot F_m(w^k) - C_m^{\text{dev}}(\gamma \cdot F_m(z^{k+1/2}) - \gamma \cdot F_m(w^k) + e_m^k)] \\ &= z^{k+1/2} - \frac{1}{M} \sum_{m=1}^M e_m^k - \gamma \cdot F(z^{k+1/2}) \\ &= \hat{z}^{k+1/2} - \gamma \cdot (F(z^{k+1/2}) - F(w^k)). \end{aligned} \tag{26}$$

**Algorithm 2** MASHA2 (handling contractive compressors)

---

**Parameters:** Stepsize  $\gamma > 0$ , number of iterations  $K$ .  
**Initialization:** Choose  $z^0 = w^0 \in \mathcal{Z}$ ,  $e_m^0 = 0$ .  
 Server sends to devices  $z^0 = w^0$  and devices compute  $F_m(w^0)$  and send to server and get  $F(w^0)$   
**for**  $k = 0, 1, 2, \dots, K - 1$  **do**  
   **for all devices in parallel do**  
      $\bar{z}^k = \tau z^k + (1 - \tau)w^k$   
      $z^{k+1/2} = \bar{z}^k - \gamma \cdot F(w^k)$   
     Generate  $\pi_m^k$  from  $\{1, \dots, r\}$  independently  
     Compute  $F_m(z^{k+1/2})$  and send to server  $C_m^{\text{dev}}(\gamma \cdot F_m(z^{k+1/2}) - \gamma \cdot F_m(w^k) + e_m^k)$   
      $e_m^{k+1} = e_m^k + \gamma \cdot F_m(z^{k+1/2}) - \gamma \cdot F_m(w^k) - C_m^{\text{dev}}(\gamma \cdot F_m(z^{k+1/2}) - \gamma \cdot F_m(w^k) + e_m^k)$   
     Compute  $F_{m,\pi_m^k}(z^{k+1/2})$  and send to server  $C_m^{\text{dev}}(\gamma \cdot F_{m,\pi_m^k}(z^{k+1/2}) - \gamma \cdot F_{m,\pi_m^k}(w^k) + e_m^k)$   
      $e_m^{k+1} = e_m^k + \gamma \cdot F_{m,\pi_m^k}(z^{k+1/2}) - \gamma \cdot F_{m,\pi_m^k}(w^k) - C_m^{\text{dev}}(\gamma \cdot F_{m,\pi_m^k}(z^{k+1/2}) - \gamma \cdot F_{m,\pi_m^k}(w^k) + e_m^k)$   
   **end for**  
   **for server do**  
     Compute  $Q^{\text{serv}} \left[ \frac{1}{M} \sum_{m=1}^M C_m^{\text{dev}}(\gamma F_m(z^{k+1/2}) - \gamma F_m(w^k) + e_m^k) \right]$  & send to devices  
     Compute  $Q^{\text{serv}} \left[ \frac{1}{M} \sum_{m=1}^M C_m^{\text{dev}}(\gamma F_{m,\pi_m^k}(z^{k+1/2}) - \gamma F_{m,\pi_m^k}(w^k) + e_m^k) \right]$  & send to devices  
     Sends to devices one bit  $b_k$ : 1 with probability  $1 - \tau$ , 0 with probability  $\tau$   
   **end for**  
   **for all devices in parallel do**  
      $z^{k+1} = z^{k+1/2} - \frac{1}{M} \sum_{m=1}^M C_m^{\text{dev}}(\gamma \cdot F_m(z^{k+1/2}) - \gamma \cdot F_m(w^k) + e_m^k)$   
      $z^{k+1} = z^{k+1/2} - \frac{1}{M} \sum_{m=1}^M C_m^{\text{dev}}(\gamma \cdot F_{m,\pi_m^k}(z^{k+1/2}) - \gamma \cdot F_{m,\pi_m^k}(w^k) + e_m^k)$   
     **if**  $b_k = 1$  **then**  
        $w^{k+1} = z^{k+1}$   
       Compute  $F_m(w^{k+1})$  and it send to server; and get  $F(w^{k+1})$   
     **else**  
        $w^{k+1} = w^k$   
     **end if**  
   **end for**  
**end for**

---

Because of such a beautiful property for hat sequences, we will use them in the proof.

**Proof of Theorem 2:** We start from these two equalities:

$$\begin{aligned} \|\hat{z}^{k+1} - z^*\|^2 &= \|z^{k+1/2} - z^*\|^2 + 2\langle \hat{z}^{k+1} - z^{k+1/2}, z^{k+1/2} - z^* \rangle + \|\hat{z}^{k+1} - z^{k+1/2}\|^2, \\ \|z^{k+1/2} - z^*\|^2 &= \|\hat{z}^k - z^*\|^2 + 2\langle z^{k+1/2} - \hat{z}^k, z^{k+1/2} - z^* \rangle - \|z^{k+1/2} - \hat{z}^k\|^2. \end{aligned}$$

Summing up, we obtain

$$\|\hat{z}^{k+1} - z^*\|^2 = \|\hat{z}^k - z^*\|^2 + 2\langle \hat{z}^{k+1} - \hat{z}^k, z^{k+1/2} - z^* \rangle + \|\hat{z}^{k+1} - z^{k+1/2}\|^2 - \|z^{k+1/2} - \hat{z}^k\|^2. \quad (27)$$

Using that  $\|a + b\|^2 \leq 2\|a\|^2 + 2\|b\|^2$  and (26), we get

$$\begin{aligned} \|\hat{z}^{k+1} - z^{k+1/2}\|^2 &\leq 2\|\hat{z}^{k+1} - \hat{z}^{k+1/2}\|^2 + 2\|\hat{z}^{k+1/2} - z^{k+1/2}\|^2 \\ &\leq 2\gamma^2 L^2 \cdot \|z^{k+1/2} - w^k\|^2 + \frac{2}{M} \sum_{m=1}^M \|e_m^k\|^2 \\ &\leq 2\gamma^2 L^2 \cdot \|z^{k+1/2} - w^k\|^2 + \frac{2}{M} \sum_{m=1}^M \|e_m^k\|^2. \end{aligned} \quad (28)$$

Additionally, here we use that  $F$  is  $L$  Lipschitz, where  $L^2 = \frac{1}{M} \sum_{m=1}^M L_m^2$ .

Next, (27) with (28) gives

$$\begin{aligned} \|\hat{z}^{k+1} - z^*\|^2 &\leq \|\hat{z}^k - z^*\|^2 + 2\langle \hat{z}^{k+1} - \hat{z}^k, z^{k+1/2} - z^* \rangle \\ &\quad + 2\gamma^2 L^2 \cdot \|z^{k+1/2} - w^k\|^2 + \frac{2}{M} \sum_{m=1}^M \|e_m^k\|^2 - \|z^{k+1/2} - \hat{z}^k\|^2. \end{aligned} \quad (29)$$

Now we consider the next inner product  $\langle \hat{z}^{k+1} - \hat{z}^k, z^{k+1/2} - z^* \rangle$ . Using that

$$\begin{aligned} \hat{z}^{k+1} - \hat{z}^k &= \hat{z}^{k+1} - \hat{z}^{k+1/2} + \hat{z}^{k+1/2} - \hat{z}^k = -\gamma \cdot (F(z^{k+1/2}) - F(w^k)) + z^{k+1/2} - z^k \\ &= -\gamma \cdot F(z^{k+1/2}) + \bar{z}^k - z^k. \end{aligned}$$

and optimality condition  $\langle F(z^*), z^{k+1/2} - z^* \rangle \geq 0$ , we get

$$\begin{aligned} 2\langle \hat{z}^{k+1} - \hat{z}^k, z^{k+1/2} - z^* \rangle &= 2\langle -\gamma \cdot F(z^{k+1/2}) + \bar{z}^k - z^k, z^{k+1/2} - z^* \rangle \\ &\leq 2\langle \gamma \cdot (F(z^*) - F(z^{k+1/2})), z^{k+1/2} - z^* \rangle \\ &\quad + 2\langle \bar{z}^k - z^k, z^{k+1/2} - z^* \rangle. \end{aligned}$$

### C.1 STRONGLY MONOTONE CASE

With Assumption 2 (SM) we obtain

$$\begin{aligned} 2\langle \hat{z}^{k+1} - \hat{z}^k, z^{k+1/2} - z^* \rangle &\leq 2\langle \gamma \cdot (F(z^*) - F(z^{k+1/2})), z^{k+1/2} - z^* \rangle + 2\langle \bar{z}^k - z^k, z^{k+1/2} - z^* \rangle \\ &\leq -2\mu_F \gamma \|z^{k+1/2} - z^*\|^2 + 2(1 - \tau) \langle \hat{w}^k - \hat{z}^k, z^{k+1/2} - z^* \rangle. \end{aligned} \quad (30)$$

Additionally we use here definition of  $\bar{z}^k$  and fact that  $\hat{w}^k - \hat{z}^k = w^k - z^k$ . Combining the obtained inequalities (29) and (30), we have

$$\begin{aligned} \|\hat{z}^{k+1} - z^*\|^2 &\leq \|\hat{z}^k - z^*\|^2 - 2\mu_F \gamma \|z^{k+1/2} - z^*\|^2 + 2(1 - \tau) \langle \hat{w}^k - \hat{z}^k, z^{k+1/2} - z^* \rangle \\ &\quad + 2\gamma^2 L^2 \cdot \|z^{k+1/2} - w^k\|^2 + \frac{2}{M} \sum_{m=1}^M \|e_m^k\|^2 - \|z^{k+1/2} - \hat{z}^k\|^2. \end{aligned}$$

The inequality  $2\langle a, b \rangle = \|a + b\|^2 - \|a\|^2 - \|b\|^2$  gives

$$\begin{aligned} \|\hat{z}^{k+1} - z^*\|^2 &\leq \|\hat{z}^k - z^*\|^2 - 2\mu_F \gamma \|z^{k+1/2} - z^*\|^2 \\ &\quad + 2(1 - \tau) \langle \hat{w}^k - z^{k+1/2}, z^{k+1/2} - z^* \rangle \\ &\quad + 2(1 - \tau) \langle z^{k+1/2} - \hat{z}^k, z^{k+1/2} - z^* \rangle \\ &\quad + 2\gamma^2 L^2 \cdot \|z^{k+1/2} - w^k\|^2 + \frac{2}{M} \sum_{m=1}^M \|e_m^k\|^2 - \|z^{k+1/2} - \hat{z}^k\|^2 \\ &= \|\hat{z}^k - z^*\|^2 - 2\mu_F \gamma \|z^{k+1/2} - z^*\|^2 \\ &\quad + (1 - \tau) \|\hat{w}^k - z^*\|^2 - (1 - \tau) \|\hat{w}^k - z^{k+1/2}\|^2 - (1 - \tau) \|z^{k+1/2} - z^*\|^2 \\ &\quad + (1 - \tau) \|z^{k+1/2} - \hat{z}^k\|^2 + (1 - \tau) \|z^{k+1/2} - z^*\|^2 - (1 - \tau) \|\hat{z}^k - z^*\|^2 \\ &\quad + 2\gamma^2 L^2 \cdot \|z^{k+1/2} - w^k\|^2 + \frac{2}{M} \sum_{m=1}^M \|e_m^k\|^2 - \|z^{k+1/2} - \hat{z}^k\|^2 \\ &= \tau \|\hat{z}^k - z^*\|^2 + (1 - \tau) \|\hat{w}^k - z^*\|^2 - 2\mu_F \gamma \|z^{k+1/2} - z^*\|^2 - (1 - \tau) \|\hat{w}^k - z^{k+1/2}\|^2 \\ &\quad + 4\gamma^2 L^2 \|\hat{w}^k - z^{k+1/2}\|^2 + 4\gamma^2 L^2 \|w^k - \hat{w}^k\|^2 + \frac{2}{M} \sum_{m=1}^M \|e_m^k\|^2 - \tau \|z^{k+1/2} - \hat{z}^k\|^2 \\ &= \tau \|\hat{z}^k - z^*\|^2 + (1 - \tau) \|\hat{w}^k - z^*\|^2 - 2\mu_F \gamma \|z^{k+1/2} - z^*\|^2 \\ &\quad - (1 - \tau - 4\gamma^2 L^2) \|\hat{w}^k - z^{k+1/2}\|^2 + (2 + 4\gamma^2 L^2) \frac{1}{M} \sum_{m=1}^M \|e_m^k\|^2 - \tau \|z^{k+1/2} - \hat{z}^k\|^2. \end{aligned} \quad (31)$$

We can weight (31) by  $p^k$  and get

$$\begin{aligned}
\sum_{k=0}^K p^k \|\hat{z}^{k+1} - z^*\|^2 &\leq \tau \sum_{k=0}^K p^k \|\hat{z}^k - z^*\|^2 + (1-\tau) \sum_{k=0}^K p^k \|\hat{w}^k - z^*\|^2 - 2\mu\gamma \sum_{k=0}^K p^k \|z^{k+1/2} - z^*\|^2 \\
&\quad - (1-\tau-4\gamma^2 L^2) \sum_{k=0}^K p^k \|\hat{w}^k - z^{k+1/2}\|^2 \\
&\quad + (2+4\gamma^2 L^2) \cdot \sum_{k=0}^K p^k \frac{1}{M} \sum_{m=1}^M \|e_m^k\|^2 - \tau \sum_{k=0}^K p^k \|z^{k+1/2} - \hat{z}^k\|^2. \quad (32)
\end{aligned}$$

Next we will take an full expectation from the both side of previous inequality. Since  $w^{k+1}$  is chosen,

$$\begin{aligned}
\mathbb{E} [\|\hat{w}^{k+1} - z^*\|^2] &= \tau \mathbb{E} \left[ \left\| \hat{w}^k + \frac{1}{M} \sum_{m=1}^M (e_m^{k+1} - e_m^k) - z^* \right\|^2 \right] + (1-\tau) \mathbb{E} [\|\hat{z}^{k+1} - z^*\|^2] \\
&\leq (1+\eta) \tau \mathbb{E} [\|\hat{w}^k - z^*\|^2] + (1+1/\eta) \tau \mathbb{E} \left[ \left\| \frac{1}{M} \sum_{m=1}^M (e_m^{k+1} - e_m^k) \right\|^2 \right] \\
&\quad + (1-\tau) \mathbb{E} [\|\hat{z}^{k+1} - z^*\|^2],
\end{aligned}$$

with weigths it gives

$$\begin{aligned}
\sum_{k=0}^K p^k \mathbb{E} [\|\hat{w}^{k+1} - z^*\|^2] &\leq (1+\eta) \tau \sum_{k=0}^K p^k \mathbb{E} [\|\hat{w}^k - z^*\|^2] + (1-\tau) \sum_{k=0}^K p^k \mathbb{E} [\|\hat{z}^{k+1} - z^*\|^2] \\
&\quad + (1+1/\eta) \tau \sum_{k=0}^K p^k \mathbb{E} \left[ \left\| \frac{1}{M} \sum_{m=1}^M (e_m^{k+1} - e_m^k) \right\|^2 \right] \\
&\leq (1+\eta) \tau \sum_{k=0}^K p^k \mathbb{E} [\|\hat{w}^k - z^*\|^2] + (1-\tau) \sum_{k=0}^K p^k \mathbb{E} [\|\hat{z}^{k+1} - z^*\|^2] \\
&\quad + 2(1+1/\eta) \tau \sum_{k=0}^K p^k \cdot \frac{1}{M} \sum_{m=1}^M \mathbb{E} [\|e_m^{k+1}\|^2] \\
&\quad + 2(1+1/\eta) \tau \sum_{k=0}^K p^k \cdot \frac{1}{M} \sum_{m=1}^M \mathbb{E} [\|e_m^k\|^2]
\end{aligned}$$

Summing this one and (32), we get

$$\begin{aligned}
& \sum_{k=0}^K p^k (\tau \|\hat{z}^{k+1} - z^*\|^2 + \|\hat{w}^{k+1} - z^*\|^2) \\
& \leq \sum_{k=0}^K p^k (\tau \|\hat{z}^k - z^*\|^2 + (1 + \tau\eta) \|\hat{w}^k - z^*\|^2) - 2\mu_F \gamma \sum_{k=0}^K p^k \|z^{k+1/2} - z^*\|^2 \\
& \quad - (1 - \tau - 4\gamma^2 L^2) \sum_{k=0}^K p^k \|\hat{w}^k - z^{k+1/2}\|^2 + \frac{2(1 + 1/\eta)\tau}{p} \sum_{k=1}^{K+1} p^k \frac{1}{M} \sum_{m=1}^M \|e_m^k\|^2 \\
& \quad + (2 + 4\gamma^2 L^2 + 2(1 + 1/\eta)\tau) \cdot \sum_{k=0}^K p^k \frac{1}{M} \sum_{m=1}^M \|e_m^k\|^2 - \tau \sum_{k=0}^K p^k \|z^{k+1/2} - \hat{z}^k\|^2 \\
& \leq \sum_{k=0}^K p^k (\tau \|\hat{z}^k - z^*\|^2 + (1 + \tau\eta) \|\hat{w}^k - z^*\|^2) - 2\mu_F \gamma \sum_{k=0}^K p^k \|z^{k+1/2} - z^*\|^2 \\
& \quad - (1 - \tau - 4\gamma^2 L^2) \sum_{k=0}^K p^k \|\hat{w}^k - z^{k+1/2}\|^2 - \tau \sum_{k=0}^K p^k \|z^{k+1/2} - \hat{z}^k\|^2 \\
& \quad + \left( 2 + 4\gamma^2 L^2 + 2(1 + 1/\eta)\tau + \frac{2(1 + 1/\eta)\tau}{p} \right) \cdot \sum_{k=0}^K p^k \frac{1}{M} \sum_{m=1}^M \|e_m^k\|^2.
\end{aligned}$$

Next we will estimate error term:

$$\begin{aligned}
\frac{1}{M} \sum_{m=1}^M \|e_m^{k+1}\|^2 &= \frac{1}{M} \sum_{m=1}^M \left\| e_m^k + \gamma \cdot F_m(z^{k+1/2}) - \gamma \cdot F_m(w^k) - C_m^{\text{dev}}(\gamma \cdot F_m(z^{k+1/2}) - \gamma \cdot F_m(w^k) + e_m^k) \right\|^2 \\
&\leq \frac{1}{M} \sum_{m=1}^M \left\| e_m^k + \gamma \cdot F_m(z^{k+1/2}) - \gamma \cdot F_m(w^k) - C_m^{\text{dev}}(\gamma \cdot F_m(z^{k+1/2}) - \gamma \cdot F_m(w^k) + e_m^k) \right\|^2 \\
&\leq \frac{(1 - 1/\delta)}{M} \sum_{m=1}^M \left\| e_m^k + \gamma \cdot F_m(z^{k+1/2}) - \gamma \cdot F_m(w^k) \right\|^2 \\
&\leq \frac{(1 - 1/\delta)}{M} \sum_{m=1}^M (1 + \xi) \|e_m^k\|^2 + (1 + 1/\xi)\gamma^2 \cdot \|F_m(z^{k+1/2}) - F_m(w^k)\|^2.
\end{aligned}$$

Here we use definition of biased compression and inequality  $\|a + b\|^2 \leq (1 + \xi)\|a\|^2 + (1 + 1/\xi)\|b\|^2$  (for  $\xi > 0$ ). With  $\xi = \frac{1}{2(\delta-1)}$  and  $\gamma \leq \frac{1}{4\delta L}$ , we get

$$\begin{aligned}
\frac{1}{M} \sum_{m=1}^M \|e_m^{k+1}\|^2 &\leq \frac{1}{M} \sum_{m=1}^M (1 - 1/2\delta) \|e_m^k\|^2 + 2\delta\gamma^2 \cdot \|F_m(z^{k+1/2}) - F_m(w^k)\|^2 \\
&\leq (1 - 1/2\delta) \frac{1}{M} \sum_{m=1}^M \|e_m^k\|^2 + 2\delta\gamma^2 L^2 \cdot \|z^{k+1/2} - w^k\|^2 \\
&\leq (1 - 1/2\delta) \frac{1}{M} \sum_{m=1}^M \|e_m^k\|^2 + 4\delta\gamma^2 L^2 \cdot \|z^{k+1/2} - \hat{w}^k\|^2 + 4\delta\gamma^2 L^2 \cdot \frac{1}{M} \sum_{m=1}^M \|e_m^k\|^2 \\
&\leq (1 - 1/2\delta + 4\delta\gamma^2 L^2) \frac{1}{M} \sum_{m=1}^M \|e_m^k\|^2 + 4\delta\gamma^2 L^2 \cdot \|z^{k+1/2} - \hat{w}^k\|^2 \\
&\leq (1 - 1/4\delta) \frac{1}{M} \sum_{m=1}^M \|e_m^k\|^2 + 4\delta\gamma^2 L^2 \cdot \|z^{k+1/2} - \hat{w}^k\|^2 \\
&\leq 4\delta\gamma^2 L^2 \sum_{j=0}^k (1 - 1/4\delta)^{k-j} \cdot \|z^{j+1/2} - \hat{w}^j\|^2.
\end{aligned}$$

We weigh the sequence as follows  $\sum_{k=0}^K p^k \cdot \frac{1}{M} \sum_{m=1}^M \|e_m^k\|^2$ , where  $p$  such as  $p^k \leq p^j(1 + 1/8\delta)^{k-j}$ .

Then

$$\begin{aligned}
\sum_{k=0}^K p^k \cdot \frac{1}{M} \sum_{m=1}^M \|e_m^k\|^2 &\leq 4\delta\gamma^2 L^2 \sum_{k=0}^K p^k \sum_{j=0}^{k-1} (1 - 1/4\delta)^{k-j-1} \cdot \|z^{j+1/2} - \hat{w}^j\|^2 \\
&\leq \frac{4\delta\gamma^2 L^2}{(1 - 1/4\delta)} \sum_{k=0}^K \sum_{j=0}^{k-1} p^j (1 + 1/8\delta)^{k-j} (1 - 1/4\delta)^{k-j} \cdot \|z^{j+1/2} - \hat{w}^j\|^2 \\
&\leq \frac{4\delta\gamma^2 L^2}{(1 - 1/4\delta)} \sum_{k=0}^K \sum_{j=0}^{k-1} p^j (1 - 1/8\delta)^{k-j} \cdot \|z^{j+1/2} - \hat{w}^j\|^2 \\
&\leq \frac{4\delta\gamma^2 L^2}{(1 - 1/4\delta)} \sum_{k=0}^K p^k \cdot \|z^{k+1/2} - \hat{w}^k\|^2 \cdot \sum_{j=0}^{\infty} (1 - 1/8\delta)^j \\
&\leq 128\delta^2\gamma^2 L^2 \sum_{k=0}^K p^k \cdot \|z^{k+1/2} - \hat{w}^k\|^2. \tag{33}
\end{aligned}$$

(33) us to the finish line of proof:

$$\begin{aligned}
&\sum_{k=0}^K p^k (\tau \|\hat{z}^{k+1} - z^*\|^2 + \|\hat{w}^{k+1} - z^*\|^2) \\
&\leq \sum_{k=0}^K p^k (\tau \|\hat{z}^k - z^*\|^2 + (1 + \tau\eta) \|\hat{w}^k - z^*\|^2) - 2\mu_F\gamma \sum_{k=0}^K p^k \|z^{k+1/2} - z^*\|^2 \\
&\quad - (1 - \tau - 4\gamma^2 L^2) \sum_{k=0}^K p^k \|\hat{w}^k - z^{k+1/2}\|^2 - \tau \sum_{k=0}^K p^k \|z^{k+1/2} - \hat{z}^k\|^2 \\
&\quad + \left( 2 + 4\gamma^2 L^2 + 2(1 + 1/\eta)\tau + \frac{2(1 + 1/\eta)\tau}{p} \right) \cdot 128\delta^2\gamma^2 L^2 \sum_{k=0}^K p^k \cdot \|z^{k+1/2} - \hat{w}^k\|^2.
\end{aligned}$$

With  $\eta = \frac{\mu_F\gamma}{4\tau}$ ,  $\gamma \leq \frac{1}{\mu_F}$  and  $p \geq 1$  we have

$$\begin{aligned}
&\sum_{k=0}^K p^k (\tau \|\hat{z}^{k+1} - z^*\|^2 + \|\hat{w}^{k+1} - z^*\|^2) \\
&\leq (1 - \mu_F\gamma/4) \sum_{k=0}^K p^k (\tau \|\hat{z}^k - z^*\|^2 + \|\hat{w}^k - z^*\|^2) \\
&\quad - \left( 1 - \tau - \mu_F\gamma - 800\delta^2\gamma^2 L^2 - 512\delta^2\gamma^4 L^4 \delta^2 - \frac{2048\delta^2\tau^2\gamma L^2}{\mu_F} \right) \cdot \sum_{k=0}^K p^k \cdot \|z^{k+1/2} - \hat{w}^k\|^2.
\end{aligned}$$

Choice  $\gamma \leq \min\left(\frac{1-\tau}{4\mu_F}, \frac{\sqrt{1-\tau}}{60\delta L}, \frac{\mu_F(1-\tau)}{10^5\tau^2\delta^2 L^2}\right)$  gives

$$\sum_{k=0}^K p^k (\tau \|\hat{z}^{k+1} - z^*\|^2 + \|\hat{w}^{k+1} - z^*\|^2) \leq (1 - \mu_F\gamma/4) \sum_{k=0}^K p^k (\tau \|\hat{z}^k - z^*\|^2 + \|\hat{w}^k - z^*\|^2).$$

Then we just need to take  $p = 1/(1 - \mu_F\gamma/4)$  (easy to check that  $p^k \leq p^j(1 + 1/8\delta)^{k-j}$  works) and get

$$(\tau \|\hat{z}^{K+1} - z^*\|^2 + \|\hat{w}^{K+1} - z^*\|^2) \leq (1 - \mu_F\gamma/4)^{K+1} (\tau \|\hat{z}^0 - z^*\|^2 + \|\hat{w}^0 - z^*\|^2).$$

This ends our proof.  $\square$



## D MOTIVATING EXAMPLES

Let us motivate the utility of considering VIs in machine learning on a handful of examples.

**Lagrangian multipliers and SVM.** Lagrange multipliers are a standard approach to solving constrained optimization problems. This technique reduces the original problem to a saddle point problem. This approach is one of the basic and classic for SVM (Shalev-Shwartz & Ben-David, 2014):

$$\min_{w,b} \max_{\lambda} \frac{1}{N} \sum_{n=1}^N \lambda_n (y_n (\langle w, x_n \rangle + b) - 1) + \frac{\beta}{2} \|w\|^2, \quad (34)$$

where  $w$  are the weights of the model,  $b$  – some number,  $\{(x_n, y_n)\}_{n=1}^N$  are pairs of the training data and labels, and  $\beta \geq 0$  is a regularization parameter.

**GANs.** A simple GAN setup consists of two parts: the discriminator  $D$  aimed at distinguishing real samples  $x$  from adversarial ones by giving probability that a sample is real, and the generator  $G$  trying to fool the discriminator by generating realistic samples from random noise  $z$ . Following Goodfellow et al. (2014), the value function  $V(G, D)$  used in such a minimax game can be expressed in a saddle point form as

$$\min_G \max_D V(D, G) := \mathbb{E}_{x \sim p_{\text{data}}(x)} [\log D(x)] + \mathbb{E}_{z \sim p_z(z)} [\log(1 - D(G(z)))]. \quad (35)$$

**Adversarial loss.** To force a model to be more stable and robust, it can be trained in a constructive way, for example, by introducing adversarial noise (Madry et al., 2017; Nouiehed et al., 2019). For example, the approach of Liu et al. (2020); Zhu et al. (2019) works well in NLP. From the point of view of theory, this latter approach reduces to the saddle point problem

$$\min_w \max_{\|\rho_1\| \leq e, \dots, \|\rho_N\| \leq e} \frac{1}{N} \sum_{n=1}^N l(f(w, x_n + \rho_n, y_n))^2 + \frac{\lambda}{2} \|w\|^2 - \frac{\beta}{2} \|\rho\|^2, \quad (36)$$

where  $w$  are the weights of the model,  $\{(x_n, y_n)\}_{n=1}^N$  are pairs of the training data and labels,  $\rho$  is the so-called adversarial noise which introduces a perturbation in the data, and  $\lambda > 0$  and  $\beta > 0$  are the regularization parameters. The main difference from a standard approach is in explicit training of  $\rho$  so that the noise from it is harmful, and for  $w$  to adapt to this noise.

**Online transport and Wasserstein barycenters** Online transport or Wasserstein Barycenter (WB) problem can be rewritten as a saddle point problem (Dvinskikh & Tiapkin, 2021). This representation comes from the dual view on the transportation polytope.
